# Supplementary material for: Genome-Wide Diet-Gene Interaction Analyses for Risk of Colorectal Cancer
Source: PLOS journal article supplement (doi:10.1371/journal.pgen.1004228), 2014-04-17

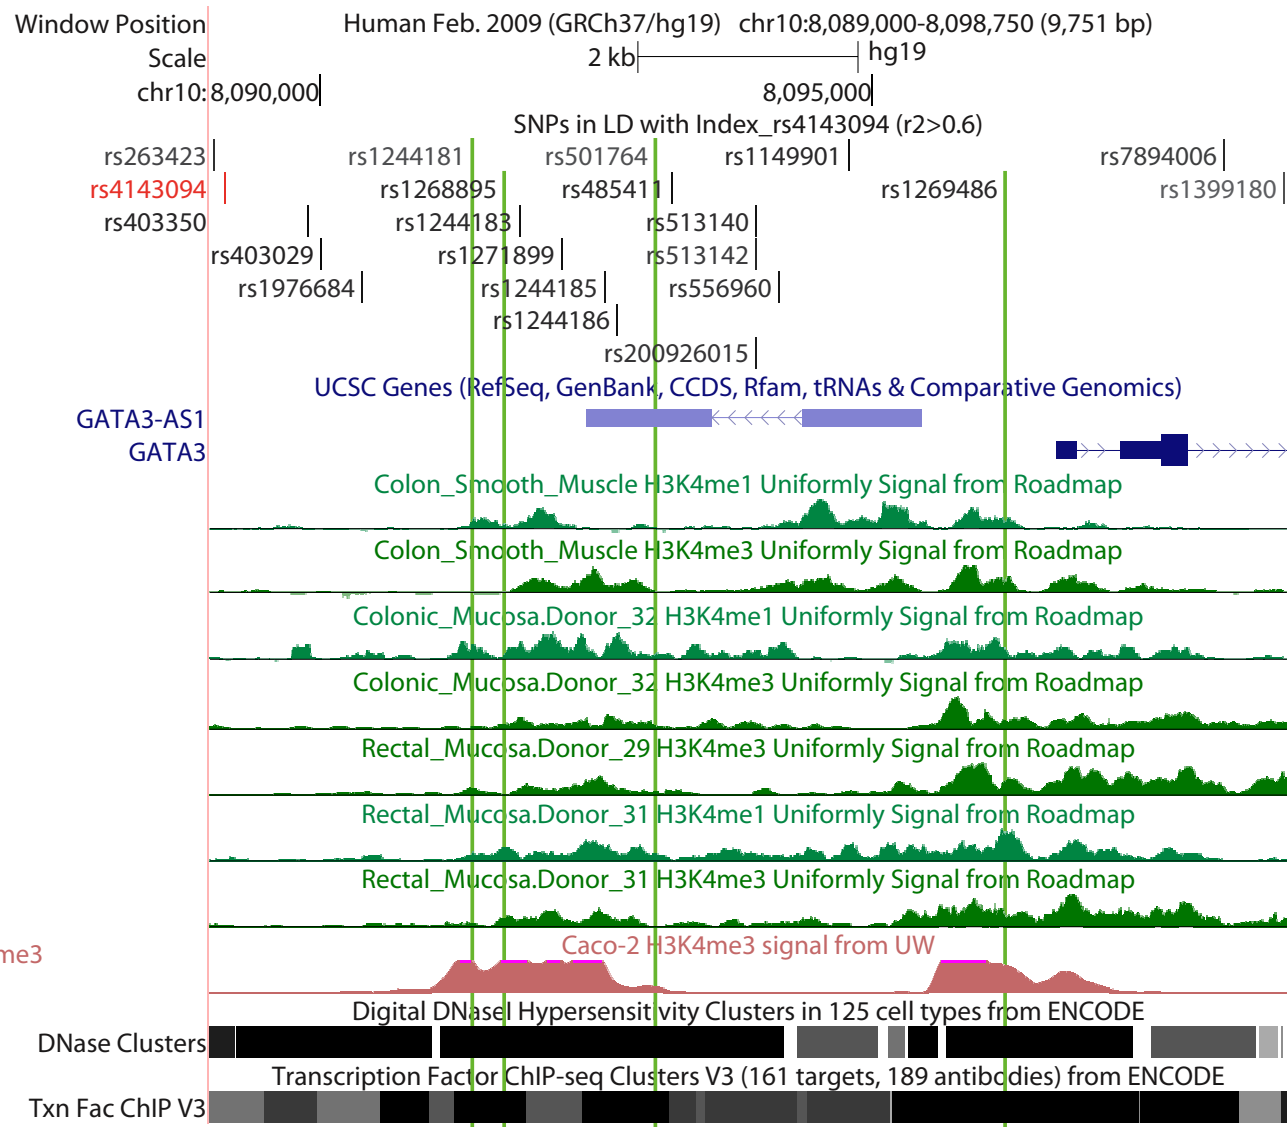

Supplement: S1 (10.1371/journal.pgen.1004228.s001) [file journal.pgen.1004228.s001]
